# Supplementary material for: The S-hindered synthesis of PbSe/PbS nanosheets with enhanced electrochemical activities
Source: Royal Society of Chemistry journal article supplement (doi:10.1039/c4nj02261k), 2015-01-01
Supplement: c4nj02261k1.pdf [file c4nj02261k1.pdf]

## Electronic Supplementary Information

### S-hindered synthesis of PbSe/PbS nanosheets with enhanced electrochemical activities

Chunshuang Yan, Gang Chen\*, Xiaorui Shi, Jian Pei\*, Jingxue Sun,  
Dahong Chen and Yongqiang Zhang

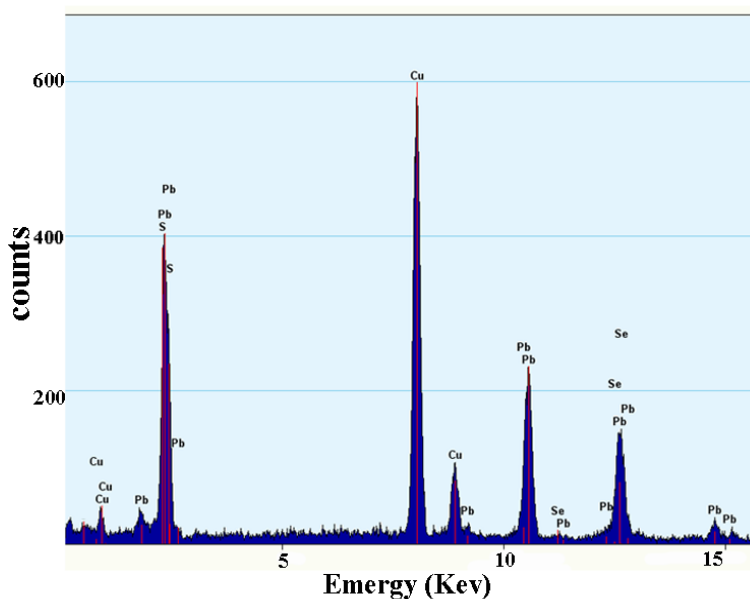

Figure S1. The EDS spectrum of the PbSe/PbS nanosheets.

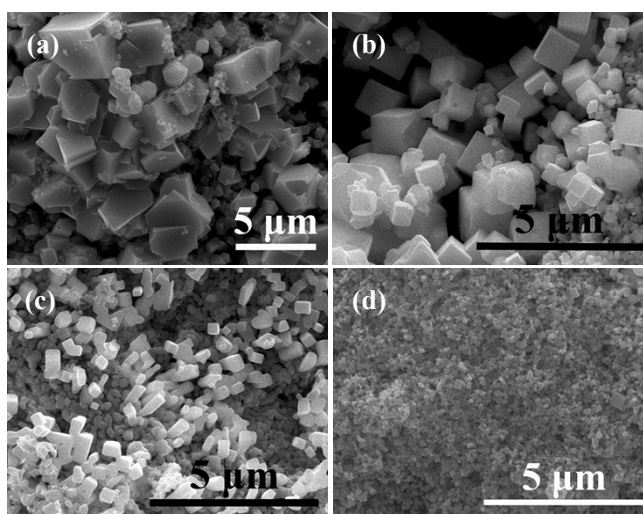

Figure S2. SEM images of samples prepared under similar conditions but with sulfur powder replaced by (a) L-cysteine, (b) thiourea, (c) thioacetamide and (d)  $\text{Na}_2\text{S}$ .

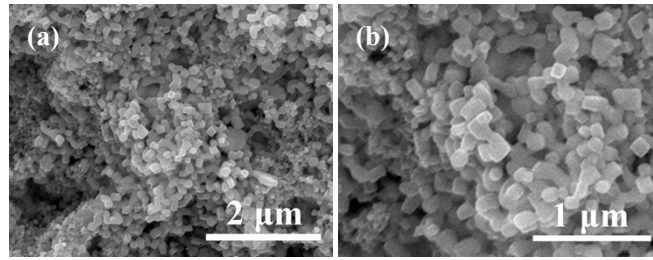

Figure S3. SEM images of samples prepared under similar conditions but with adding 2 ml hydrazine hydrate.

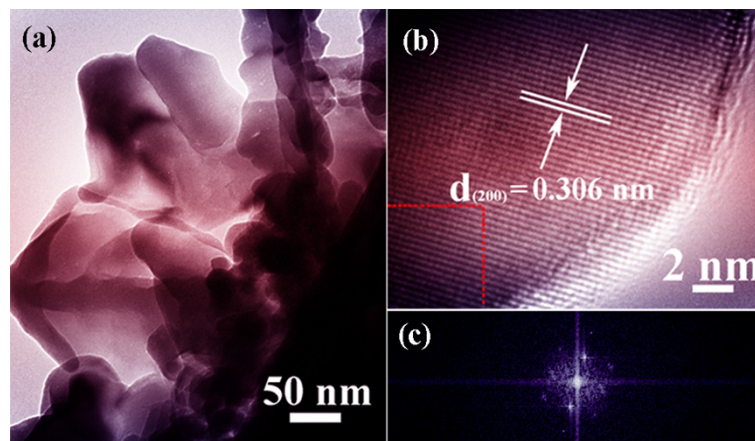

Figure S4. Characterization of PbSe flower-like crystals obtained at 180 °C for 24 h in the presence of 0g sulfur powder: (a) TEM and (b) HRTEM image taken from the corner of a single sheet, (c) corresponding FFT patterns of HRTEM images from red square region.

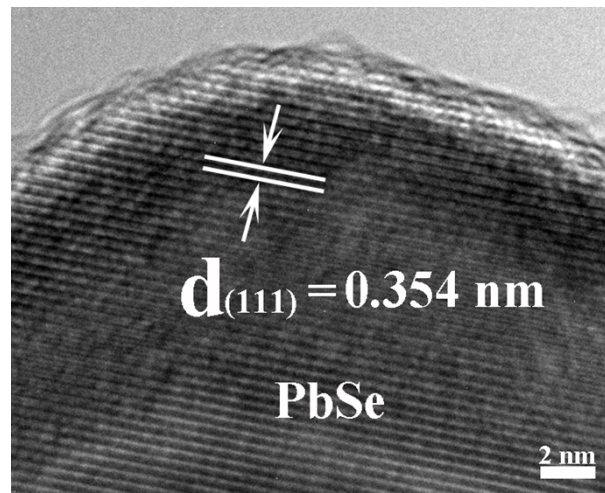

Figure S5. The HRTEM images of free PbSe.

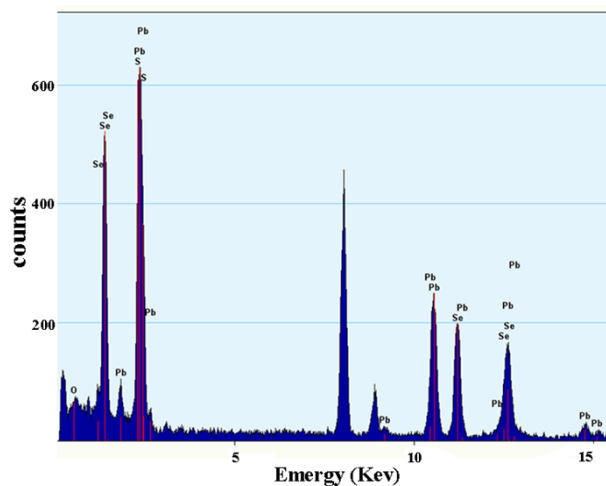

Figure S6. The EDS spectrum of the samples ( $x_{\text{pBs}} = 0.4$ ).

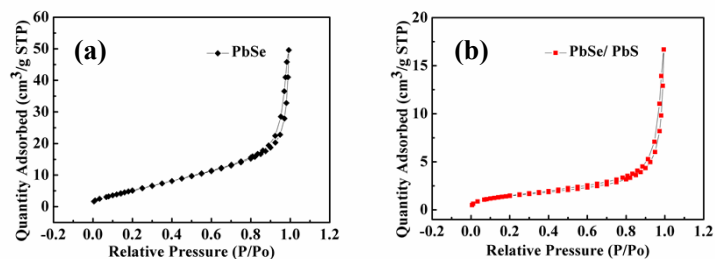

Figure S7. Typical nitrogen adsorption-desorption isotherm of the flower-microsphere PbSe (a) and nanosheet PbSe/PbS with GB (b).

### The expression for the effective diffusion coefficient

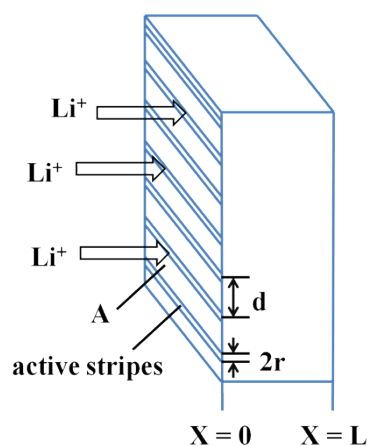

Figure. S4 Schematic of master examples. Surface exchange takes place at active stripes.

### Diffusion of Lithium-ion in a binary mixed conducting chalcogenides with electron and doubly charged ionic defects (ion)

The partial conductivities due to individual defects are denoted:  $\sigma_j$  (the subscript  $j$  stands for ion,

electron(eon))

charge number:  $z_j$

diffusion coefficient:  $D$

stoichiometry numbers associated with the reaction  $\text{Li} \rightleftharpoons \text{Li}^+ + \text{e}^- : \nu_j$ .

ambipolar conductivity:  $\sigma^\delta \equiv \sigma_{\text{ion}}\sigma_{\text{ion}^-}/(\sigma_{\text{ion}} + \sigma_{\text{ion}^-})$

diffusion resistance:  $R^\delta$

In the linear regime  $\Delta_\mu = \partial_\mu/\partial_c (c_{x=d} - c_{x=0})$

rate constant of local active sites:  $k_{\text{local}}$

apparent surface rate constant:  $k_{\text{app}}$

Recalling<sup>1</sup> that,  $D^\delta = (ez_j \nu_j)^{-2} \sigma^\delta \partial_\mu/\partial_c$ , subsurface layer of thickness  $d$  yielding the flux:  $J_x = -4D^\delta$

$$\frac{r}{d^2} (c_{x=d} - c_{x=0})$$

The flux density through the active sites, scales with the flux density  $J_x^{\text{local}}$  at  $x = d$  with the

geometric factor contact area/total area =  $\frac{\pi r^2}{d^2}$ . In addition, if  $L \gg d$ ,  $c_{x=d}$  can be replaced by  $c_{x=0}$ .

Taking this into account, above equation rewrites as

$$\frac{1}{k_{\text{app}}} \approx \frac{1}{4Dr/d^2} + \frac{1}{k_{\text{local}}\pi(r/d)^2}$$

In cases in which the local surface kinetics is very fast ( $k_{\text{local}} \rightarrow \infty$ ),  $k_{\text{app}}$  simplifies to

$$k_{\text{app}} \approx 4Dr/d^2$$

1. C. Wagner and Prog. Solid State Chem., 1975, 10, 3.
